# Supplementary material for: Influence of diamine structure on the properties of colorless and transparent polyimides
Source: publisher site journal article supplement (doi:10.1515/rams-2025-0190), 2025-01-01

**Supplementary Figure I: 13C-NMR**


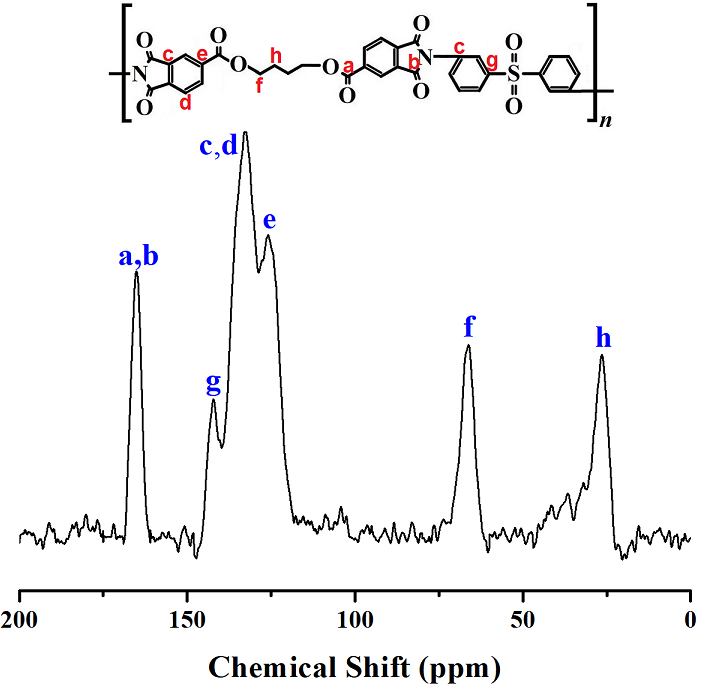


**Supplementary-Figure S1****.** 13C-NMR spectrum of structure IV based on BU-DA monomer.

**Supplementary-Table S1.** 13C-NMR peak

assignments of structure IV.

| **Peak** | **Chemical Shift (ppm)** |
| --- | --- |
| a, b | 165.27 |
| c, d | 132.64 |
| e | 126.07 |
| f | 66.45 |
| g | 142.25 |
| h | 26.77 |


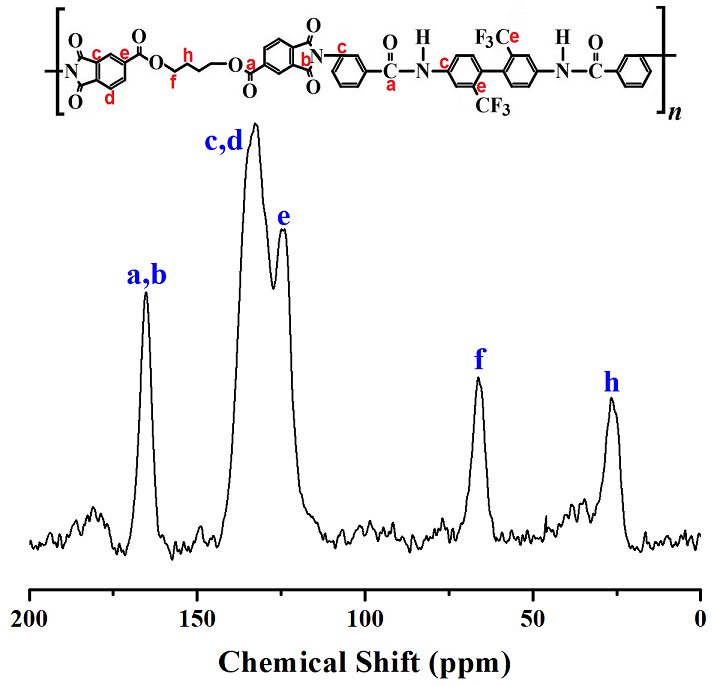


**Supplementary-Figure S2.** 13C-NMR spectrum of structure VII based on BU-DA monomer.

| **Peak** | **Chemical Shift (ppm)** |
| --- | --- |
| a, b | 165.53 |
| c, d | 132.68 |
| e | 124.74 |
| f | 66.31 |
| h | 26.53 |

**Supplementary-Table S2.** 13C-NMR peak

assignments of structure VII.

**Supplementary Figure II: 1H-NMR**


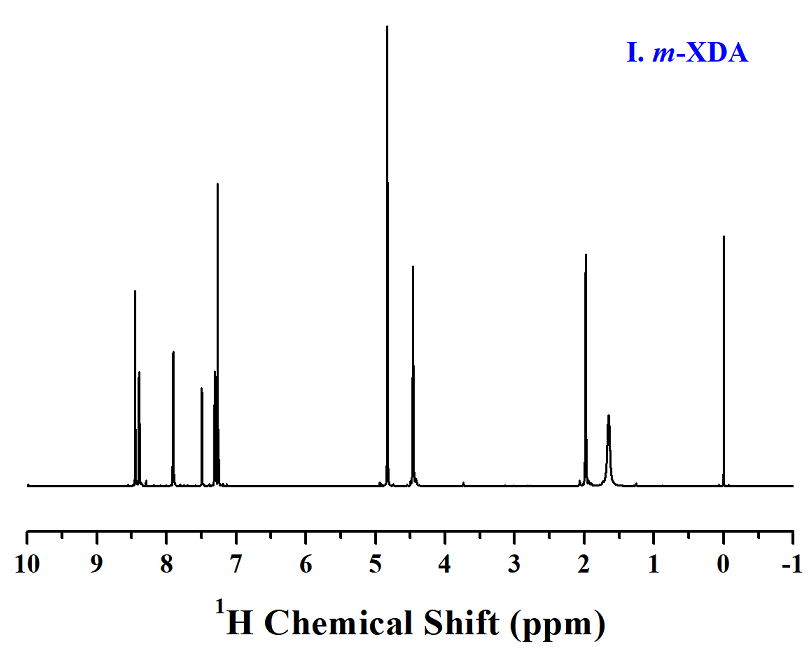


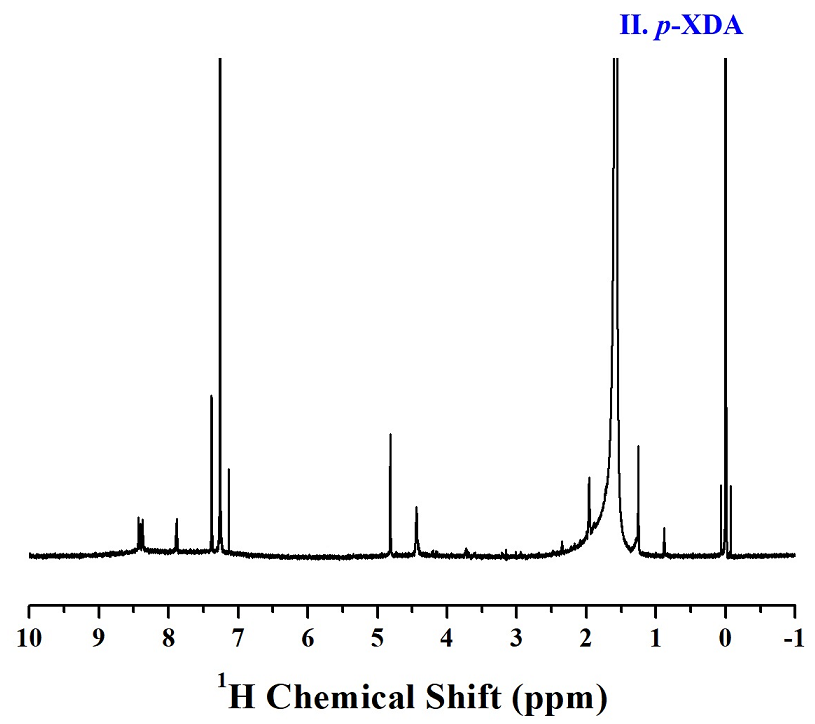


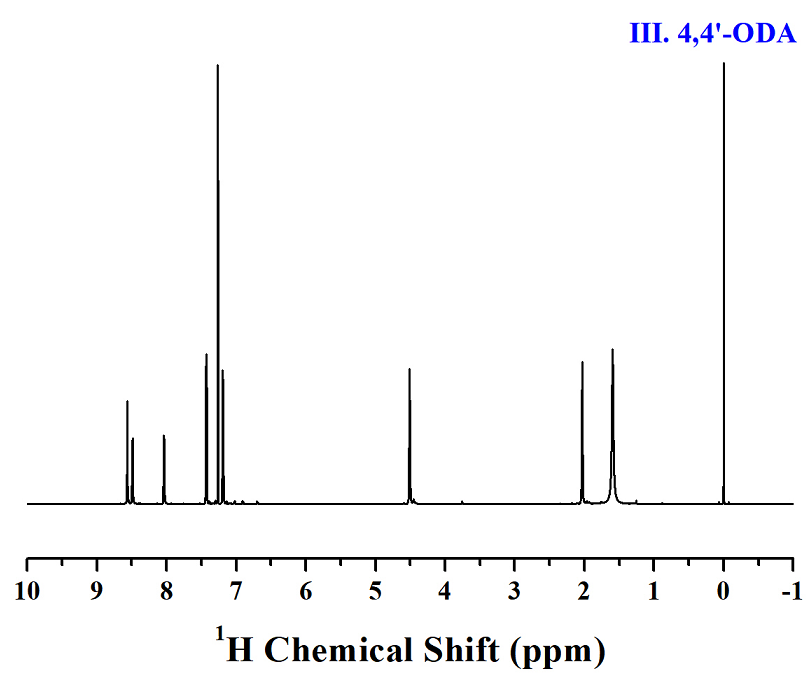


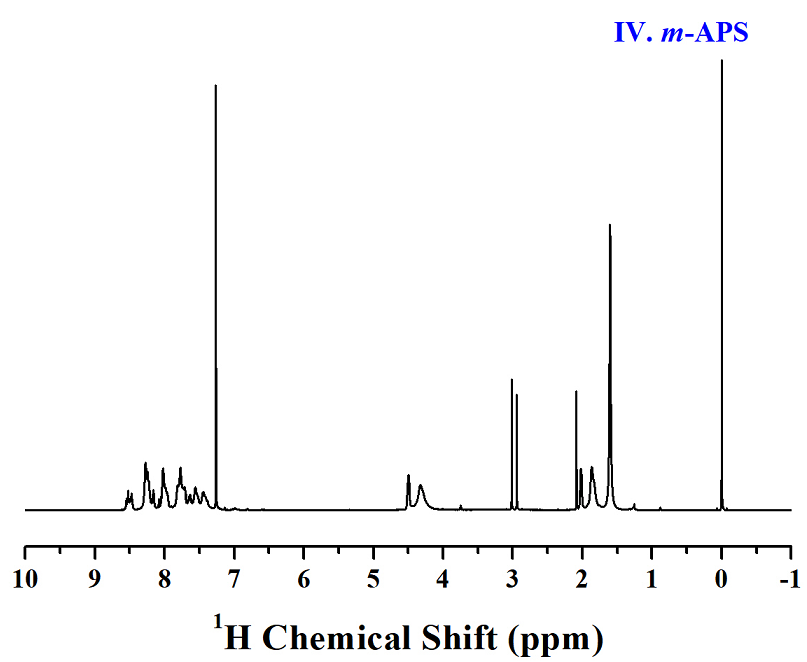


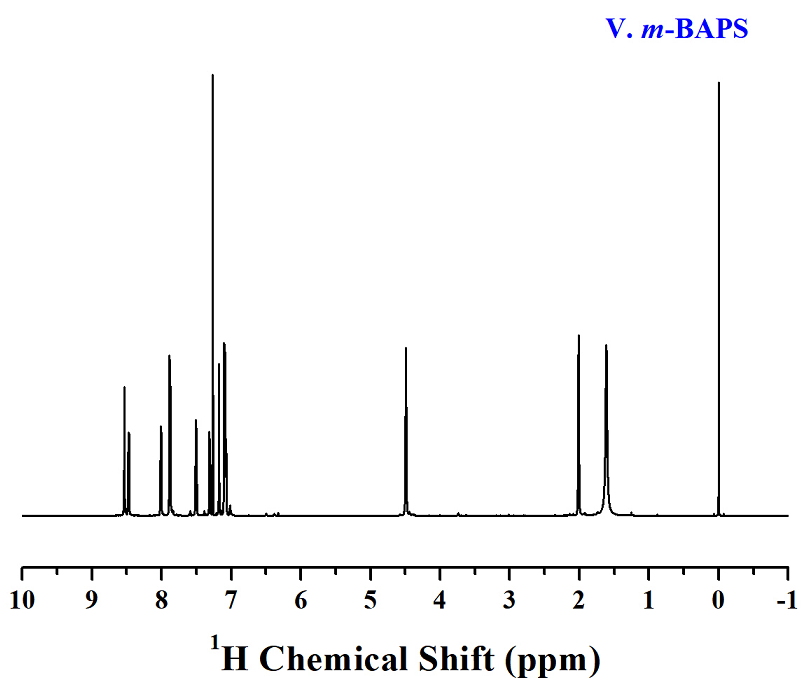


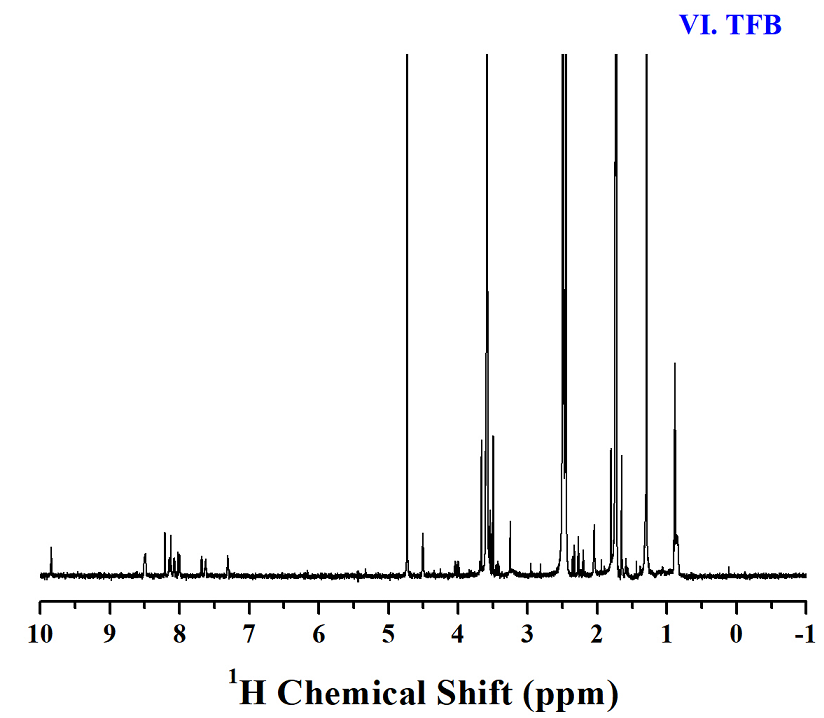


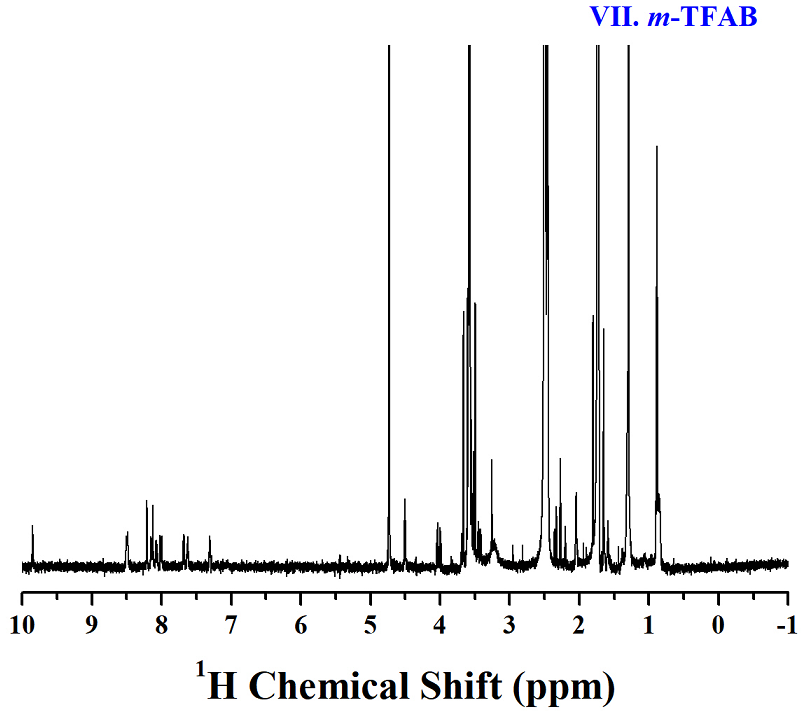


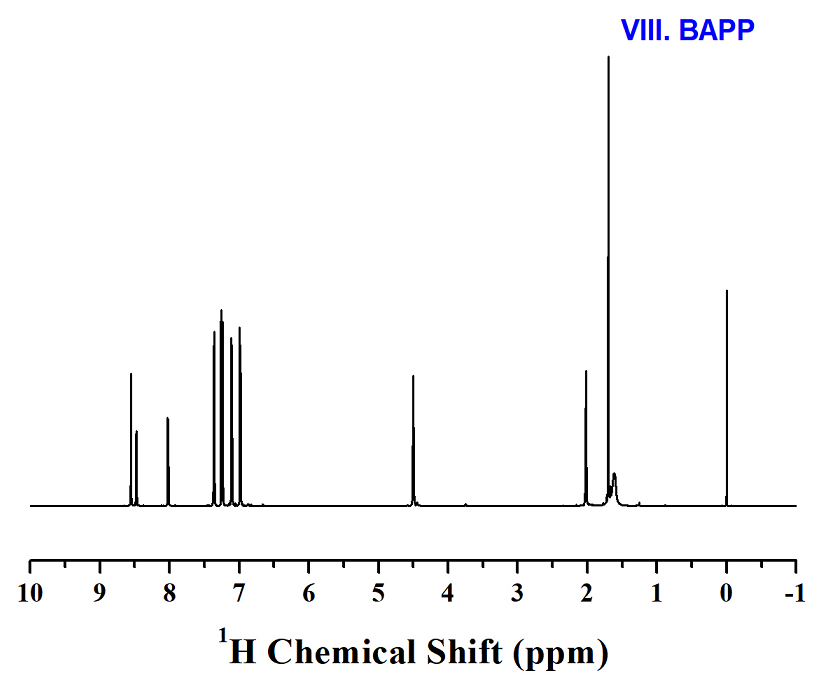


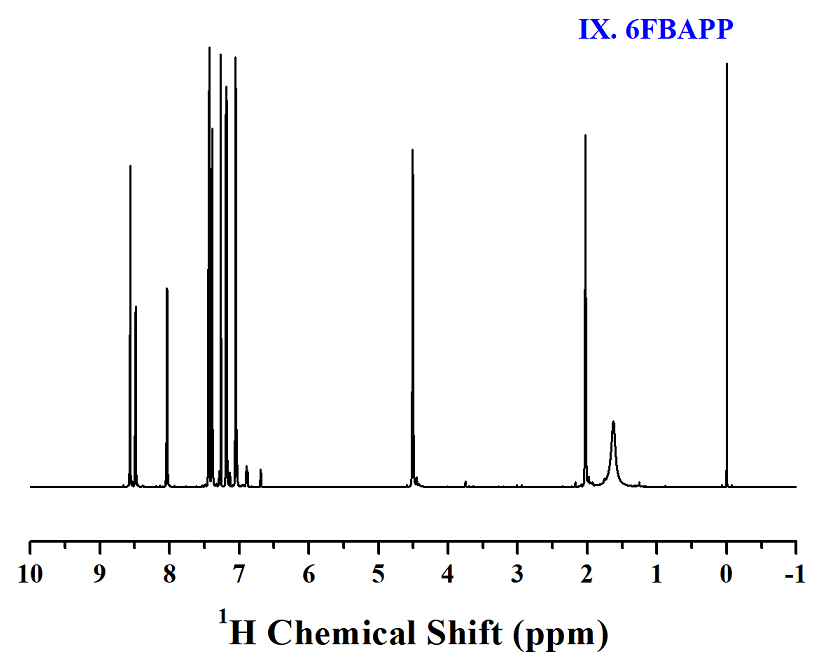


**Supplementary Figure III: TGA/DTG**


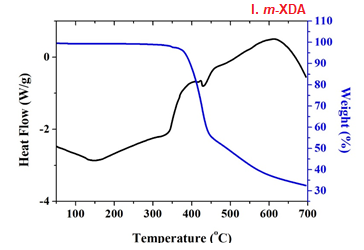


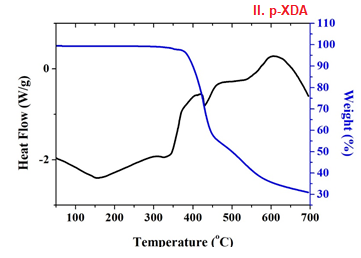


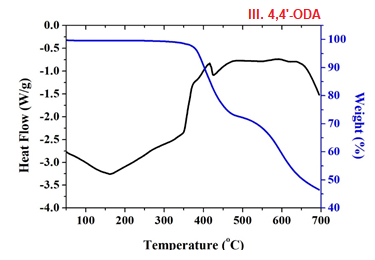


**
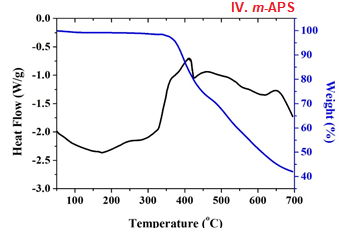
**


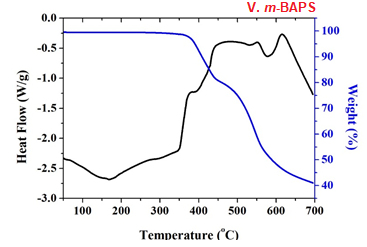


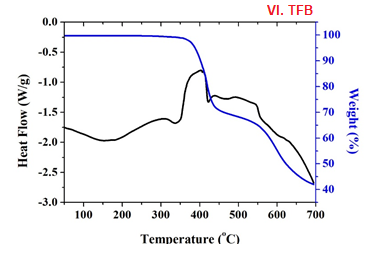


**
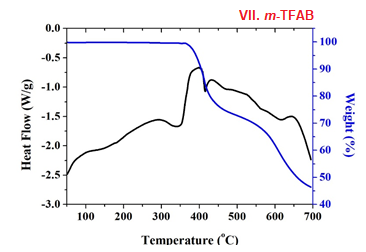
**


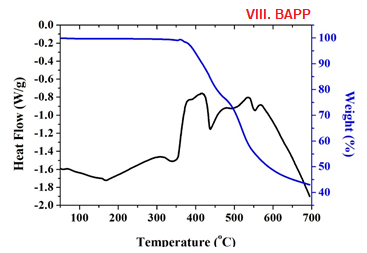


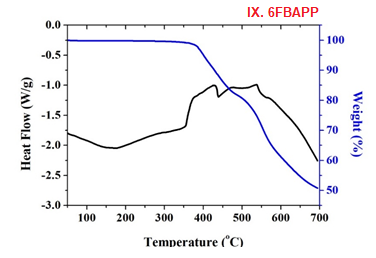

Supplement: Supplementary file 1 [file j_rams-2025-0190_suppl_001.docx]
